# Supplementary material for: The Dockstore: enhancing a community platform for sharing reproducible and accessible computational protocols
Source: Oxford University Press journal article supplement (doi:10.1093/nar/gkab346), 2021-04-27
Supplement: gkab346_supplemental_file.pdf [file gkab346_supplemental_file.pdf]

## Supplemental Data

### Highlighted documentation, tutorials, and trainings:

|                                                          |                                                                                                                                                                                                                                                     |
|----------------------------------------------------------|-----------------------------------------------------------------------------------------------------------------------------------------------------------------------------------------------------------------------------------------------------|
| Launching Tools and Workflows                            | <a href="https://docs.dockstore.org/en/develop/launch-with/launch.html">https://docs.dockstore.org/en/develop/launch-with/launch.html</a>                                                                                                           |
| Getting Started Guide                                    | <a href="https://docs.dockstore.org/en/develop/getting-started/getting-started.html">https://docs.dockstore.org/en/develop/getting-started/getting-started.html</a>                                                                                 |
| Registering Your Workflow to Dockstore                   | <a href="https://docs.dockstore.org/en/develop/getting-started/dockstore-workflows.html#register-your-workflow-in-dockstore">https://docs.dockstore.org/en/develop/getting-started/dockstore-workflows.html#register-your-workflow-in-dockstore</a> |
| Docker Registries                                        | <a href="https://docs.dockstore.org/en/develop/advanced-topics/docker-registries.html#">https://docs.dockstore.org/en/develop/advanced-topics/docker-registries.html#</a>                                                                           |
| Best Practices for Secure and FAIR Workflows             | <a href="https://docs.dockstore.org/en/develop/advanced-topics/best-practices/best-practices-secure-fair-workflows.html">https://docs.dockstore.org/en/develop/advanced-topics/best-practices/best-practices-secure-fair-workflows.html</a>         |
| Checker Workflows                                        | <a href="https://docs.dockstore.org/en/develop/advanced-topics/checker-workflows.html">https://docs.dockstore.org/en/develop/advanced-topics/checker-workflows.html</a>                                                                             |
| Creating Snapshots and Requesting DOIs                   | <a href="https://docs.dockstore.org/en/develop/advanced-topics/snapshot-and-doi.htm">https://docs.dockstore.org/en/develop/advanced-topics/snapshot-and-doi.htm</a>                                                                                 |
| Dockstore GitHub Apps documentation                      | <a href="https://docs.dockstore.org/en/develop/getting-started/github-apps/github-apps.html">https://docs.dockstore.org/en/develop/getting-started/github-apps/github-apps.html</a>                                                                 |
| BCC2020 Workshop: Introduction to Docker and Descriptors | <a href="https://github.com/dockstore/bcc2020-training">https://github.com/dockstore/bcc2020-training</a>                                                                                                                                           |

### Links to example content available on Dockstore and mentioned in text:

|                                                  |                                                                                                                     |
|--------------------------------------------------|---------------------------------------------------------------------------------------------------------------------|
| BD Catalyst Organization                         | <a href="https://dockstore.org/organizations/bdcatalyst">https://dockstore.org/organizations/bdcatalyst</a>         |
| AnVIL Organization                               | <a href="https://dockstore.org/organizations/anvil">https://dockstore.org/organizations/anvil</a>                   |
| Broad Institute Organization                     | <a href="https://dockstore.org/organizations/BroadInstitute">https://dockstore.org/organizations/BroadInstitute</a> |
| nf-core Organization                             | <a href="https://dockstore.org/organizations/nfcore">https://dockstore.org/organizations/nfcore</a>                 |
| PCAWG Organization                               | <a href="https://dockstore.org/organizations/PCAWG">https://dockstore.org/organizations/PCAWG</a>                   |
| Example of DOI exported from Dockstore to Zenodo | <a href="https://doi.org/10.5281/zenodo.4465061">https://doi.org/10.5281/zenodo.4465061</a>                         |

A number of software packages, “Launch with” partners, and communities are mentioned in the main text but often lack publications and/or have substantial online documentation. Here we gather links to a number of these:

|                                  |                                                                                                                                                                                                                                                     |
|----------------------------------|-----------------------------------------------------------------------------------------------------------------------------------------------------------------------------------------------------------------------------------------------------|
| Agora                            | <a href="https://github.com/broadinstitute/agora">https://github.com/broadinstitute/agora</a>                                                                                                                                                       |
| GA4GH TRS                        | <a href="https://www.ga4gh.org/news/tool-registry-service-api-enabling-an-interoperable-library-of-genomics-analysis-tools/">https://www.ga4gh.org/news/tool-registry-service-api-enabling-an-interoperable-library-of-genomics-analysis-tools/</a> |
| GA4GH WES                        | <a href="https://www.ga4gh.org/news/ga4gh-wes-api-enables-portable-genomic-analysis/">https://www.ga4gh.org/news/ga4gh-wes-api-enables-portable-genomic-analysis/</a>                                                                               |
| Marked (Markdown implementation) | <a href="https://marked.js.org/">https://marked.js.org/</a>                                                                                                                                                                                         |
| DNASTack                         | <a href="https://www.dnastack.com/">https://www.dnastack.com/</a>                                                                                                                                                                                   |
| DNAnexus                         | <a href="https://www.dnanexus.com/">https://www.dnanexus.com/</a>                                                                                                                                                                                   |
| Terra                            | <a href="https://terra.bio/">https://terra.bio/</a>                                                                                                                                                                                                 |
| FireCloud                        | <a href="https://datacommons.cancer.gov/analytical-resource/broad-firecloud">https://datacommons.cancer.gov/analytical-resource/broad-firecloud</a>                                                                                                 |
| Cancer Genomics Cloud            | <a href="https://www.cancergenomicscloud.org/">https://www.cancergenomicscloud.org/</a>                                                                                                                                                             |
| AnVIL                            | <a href="https://anvilproject.org/">https://anvilproject.org/</a>                                                                                                                                                                                   |
| NHLBI Biodata Catalyst           | <a href="https://biodatacatalyst.nhlbi.nih.gov/">https://biodatacatalyst.nhlbi.nih.gov/</a>                                                                                                                                                         |
| CAVATICA                         | <a href="https://cavatica.squarespace.com/">https://cavatica.squarespace.com/</a>                                                                                                                                                                   |
| Galaxy Project                   | <a href="https://galaxyproject.org/">https://galaxyproject.org/</a>                                                                                                                                                                                 |
| NHGRI                            | <a href="https://www.genome.gov/about-nhgri/NHGRI-Vision-and-Mission">https://www.genome.gov/about-nhgri/NHGRI-Vision-and-Mission</a>                                                                                                               |
| nf-core                          | <a href="https://nf-co.re/">https://nf-co.re/</a>                                                                                                                                                                                                   |
| Angular                          | <a href="https://github.com/angular">https://github.com/angular</a> and<br><a href="https://books.ninja-squad.com/angular">https://books.ninja-squad.com/angular</a>                                                                                |
